# Supplementary material for: Orthopaedic Implant-Associated Staphylococcal Infections: A Critical Reappraisal of Unmet Clinical Needs Associated with the Implementation of the Best Antibiotic Choice
Source: MDPI journal article supplement (doi:10.3390/antibiotics11030406), 2022-03-17
Supplement: s1 [file s1]

## Perspective

# Orthopaedic Implant-Associated Staphylococcal Infections: A Critical Reappraisal of Unmet Clinical Needs Associated with the Implementation of the Best Antibiotic Choice

Milo Gatti <sup>1,2</sup>, Simona Barnini <sup>3</sup>, Fabio Guarracino <sup>4</sup>, Eva Maria Parisio <sup>5</sup>, Michele Spinicci <sup>6,7</sup>, Bruno Viaggi <sup>8</sup>, Sara D'Arienzo <sup>9</sup>, Silvia Forni <sup>9</sup>, Angelo Galano <sup>10</sup> and Fabrizio Gemmi <sup>9,\*</sup>

**Citation:** Gatti, M.; Barnini, S.; Guarracino, F.; Parisio, E.M.; Spinicci, M.; Viaggi, B.; D'Arienzo, S.; Forni, S.; Galano, A.; Gemmi, F. Orthopaedic Implant-Associated Staphylococcal Infections: A Critical Reappraisal of Unmet Clinical Needs Associated with the Implementation of the Best Antibiotic Choice. *Antibiotics* **2022**, *11*, 406. <https://doi.org/10.3390/antibiotics11030406>

Academic Editors: Ciro Villani and Daniele De Meo

Received: 14 February 2022

Accepted: 16 March 2022

Published: 17 March 2022

**Publisher's Note:** MDPI stays neutral with regard to jurisdictional claims in published maps and institutional affiliations.

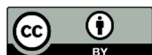

**Copyright:** © 2022 by the author. Licensee MDPI, Basel, Switzerland. This article is an open access article distributed under the terms and conditions of the Creative Commons Attribution (CC BY) license (<https://creativecommons.org/licenses/by/4.0/>).

- <sup>1</sup> Department of Medical and Surgical Sciences, Alma Mater Studiorum University of Bologna, 40138 Bologna, Italy; milo.gatti2@unibo.it
  - <sup>2</sup> SSD Clinical Pharmacology, Department for Integrated Infectious Risk Management, IRCCS Azienda Ospedaliero-Universitaria di Bologna, 40138 Bologna, Italy
  - <sup>3</sup> Bacteriology Unit, Azienda Ospedaliero-Universitaria Pisana, 56126 Pisa, Italy; s.barnini@ao-pisa.toscana.it
  - <sup>4</sup> Department of Anaesthesia and Critical Care Medicine, Azienda Ospedaliero Universitaria Pisana, 56126 Pisa, Italy; f.guarracino@ao-pisa.toscana.it
  - <sup>5</sup> UOSD Microbiologia Arezzo PO San Donato–Azienda Usl Toscana Sud Est, 52100 Arezzo, Italy; evamaria.parisio@uslsudest.toscana.it
  - <sup>6</sup> Department of Experimental and Clinical Medicine, University of Florence, 50134 Florence, Italy; michele.spinicci@unifi.it
  - <sup>7</sup> Infectious and Tropical Diseases Unit, Careggi University Hospital, 50134 Florence, Italy
  - <sup>8</sup> Neurointensive Care Unit, Department of Anesthesiology, Careggi University Hospital, 50134 Florence, Italy; bruno.viaggi@gmail.com
  - <sup>9</sup> Agenzia Regionale di Sanità della Toscana, 50141 Florence, Italy; sara\_88fi@hotmail.it (S.D.); silvia.forni@ars.toscana.it (S.F.)
  - <sup>10</sup> SOD Microbiologia e virologia, Careggi University Hospital, 50134 Florence, Italy; galanoa@aou-careggi.toscana.it
- \* Correspondence: fabrizio.gemmi@ars.toscana.it

**Table S1.** A summary of the evidence investigating the off-label use of novel lipoglycopeptides for the management of infections associated with orthopaedic implants.

| Author, year, and reference | Study design                             | No. of patients                                    | Clinical features                                             | Prior antibiotic and duration | Antibiotic and dosing                                                                                                                                                                                                                                  | Isolates                                                                                                                                                                                                                         | Duration of follow-up                      | Outcome                                                                                                                                                                   | Relapse rate – Resistance development | Safety (Overall proportion of AEs) |
|-----------------------------|------------------------------------------|----------------------------------------------------|---------------------------------------------------------------|-------------------------------|--------------------------------------------------------------------------------------------------------------------------------------------------------------------------------------------------------------------------------------------------------|----------------------------------------------------------------------------------------------------------------------------------------------------------------------------------------------------------------------------------|--------------------------------------------|---------------------------------------------------------------------------------------------------------------------------------------------------------------------------|---------------------------------------|------------------------------------|
| Dalbavancin                 |                                          |                                                    |                                                               |                               |                                                                                                                                                                                                                                                        |                                                                                                                                                                                                                                  |                                            |                                                                                                                                                                           |                                       |                                    |
| Morata et al., 2019 [29]    | Retrospective cohort study, multicentric | 64                                                 | 45 Implant-associated infection<br>19 Bone or joint infection | 100.0%                        | Dalbavancin 30 S.<br>LD 1000 mg (n = 50) –<br>1500 mg (n = 12) –<br>500 mg (N = 4<br>1) – 750 mg (n = 1)<br>Single dose (n = 9)<br>Followed by 500 mg/week (n = 54; median duration 5 weeks)<br>Followed by 1500 mg biweekly (n = 1; four total doses) | 30 S. <i>epidermidis</i><br>14 S. <i>aureus</i><br>5 E. <i>faecalis</i><br>4 E. <i>faecium</i><br>3 C. <i>striatum</i><br>3 <i>Streptococcus spp</i><br>2 S. <i>lugdunensis</i><br>1 S. <i>capitis</i><br>1 S. <i>pneumoniae</i> | Latest medical visit                       | Clinical success or improvement: 97.7%<br>(implant-associated infections)<br>Clinical success or improvement: 89.5%<br>(bone or joint infections)<br>Mortality rate: 6.3% | Relapse: 3.1%                         | NA                                 |
| Wunsch et al., 2019 [30]    | Retrospective cohort study, multicentric | 62<br>(101 overall patients included in the study) | 32 prosthetic joint infection                                 | 100.0%                        | Dalbavancin 1500 mg single dose<br>or                                                                                                                                                                                                                  | 28 CoNS<br>14 MSSA<br>8 MRSA                                                                                                                                                                                                     | 90 days after the last dose of dalbavancin | Overall clinical success: 89%<br>(93.6% bone and joint infections)                                                                                                        | NA                                    | 3%<br>(overall)                    |

|                              |                                                |                                                         |                                                                                                                                                   |       |                                                                                               |                                                                                                      |             |                                                                                                                                                                          |                                                    |                                                                                   |
|------------------------------|------------------------------------------------|---------------------------------------------------------|---------------------------------------------------------------------------------------------------------------------------------------------------|-------|-----------------------------------------------------------------------------------------------|------------------------------------------------------------------------------------------------------|-------------|--------------------------------------------------------------------------------------------------------------------------------------------------------------------------|----------------------------------------------------|-----------------------------------------------------------------------------------|
|                              |                                                |                                                         | 30<br>osteomyelitis                                                                                                                               |       | 1500 mg +<br>1500 mg                                                                          | 7 <i>Enterococcus</i><br><i>spp</i>                                                                  |             | 90-day mortality rate:<br>5%                                                                                                                                             |                                                    |                                                                                   |
|                              |                                                |                                                         |                                                                                                                                                   |       | or                                                                                            | 5<br><i>Streptococcus</i><br><i>spp</i>                                                              |             | (3.2% bone and joint<br>infections)                                                                                                                                      |                                                    |                                                                                   |
|                              |                                                |                                                         | OPAT 49%                                                                                                                                          |       | 1000 mg + 500<br>mg                                                                           | 4 <i>P. acnes</i><br>21 Others                                                                       |             | Overall clinical<br>failure: 5%                                                                                                                                          |                                                    |                                                                                   |
|                              |                                                |                                                         |                                                                                                                                                   |       |                                                                                               |                                                                                                      |             | (3.2% bone and joint<br>infections)                                                                                                                                      |                                                    |                                                                                   |
| Bai et al., 2020 [31]        | Retrospective<br>cohort study,<br>multicentric | 50<br>(82 overall patients<br>included in the<br>study) | 25<br>Osteomyelitis<br><br>17<br>Prosthetic<br>joint<br>infections<br><br>4<br>Spondylodiscitis<br><br>4 Septic<br>arthritis<br><br>OPAT<br>57.8% | 82.5% | Dalbavancin<br>1000 mg (LD)<br>+ 500 mg<br><br>or<br><br>1500 mg<br>single dose               | 28 CoNS<br>24 MRSA<br><br>14 MSSA<br><br>6 <i>E. faecalis</i><br>5 <i>E. faecium</i><br><br>5 Others | 30-180 days | Clinical success at<br>end of study:<br><br>89.7% (osteomyelitis<br>– spondylodiscitis)<br><br>76.5% (prosthetic<br>joint infections)<br><br>75.0% (septic<br>arthritis) | Relapse:<br>17.8%<br><br>(overall in the<br>study) | 7.0%                                                                              |
| Tobudic et al., 2019<br>[32] | Retrospective<br>cohort study                  | 46<br>(72 overall patients<br>included in the<br>study) | 20<br>Osteomyelitis<br><br>14<br>Spondylodiscitis                                                                                                 | 81%   | Dalbavancin<br>1000 mg LD +11<br>500 mg<br>weekly<br><br>1500 mg LD +6<br>1000 mg<br>biweekly | 27 MSSA<br>11<br><i>Streptococcus</i><br><i>spp</i><br><br>6 MRSA<br>5 MSSE                          | 6 months    | Clinical cure:<br><br>56.5%<br><br>(overall bone and<br>joint infections)<br><br>Osteomyelitis: 60%<br><br>Spondylodiscitis: 50%                                         | NA                                                 | 8.7%<br><br>(rash <i>N</i> =2; nausea <i>N</i> =1;<br>hyperglycaemia <i>N</i> =1) |

|                                |                                          |    |                                                        |                        |                                                                                                                            |                   |                                  |                |                                                   |  |
|--------------------------------|------------------------------------------|----|--------------------------------------------------------|------------------------|----------------------------------------------------------------------------------------------------------------------------|-------------------|----------------------------------|----------------|---------------------------------------------------|--|
|                                |                                          |    | 8 Prosthetic joint infections                          |                        | 1500 mg day 3 MRSE<br>1 + 1500 mg day 8 3 <i>Enterococcus spp</i>                                                          |                   | Acute septic arthritis: 100%     |                |                                                   |  |
|                                |                                          |    | 4 Acute septic arthritis                               |                        |                                                                                                                            |                   | Prosthetic joint infections: 38% |                |                                                   |  |
|                                |                                          |    |                                                        |                        |                                                                                                                            |                   | Clinical failure: 23.9%          |                |                                                   |  |
| Bouza et al., 2018 [33]        | Retrospective cohort study, multicentric | 33 | 20 Prosthetic joint infection                          | 97.1% (median 18 days) | Dalbavancin 16 CoNS<br>1500 mg single dose or 4 MSSA                                                                       | NA                | Clinical success: 84.8%          | Relapse: 6.1%  | 13.0% (2.9% serious)                              |  |
|                                |                                          |    | 12 Osteomyelitis                                       |                        | 1000 mg (LD) 3 <i>Enterococcus spp</i><br>+ 500 mg                                                                         |                   |                                  |                |                                                   |  |
|                                |                                          |    | 1 Septic arthritis                                     |                        | 4 Others                                                                                                                   |                   |                                  |                |                                                   |  |
|                                |                                          |    | OPAT 73.9%                                             |                        |                                                                                                                            |                   |                                  |                |                                                   |  |
| Buzon Martin et al., 2019 [34] | Retrospective cohort study               | 16 | All prosthetic joint infections                        | NA                     | Dalbavancin 7 CoNS<br>LD 1500 mg +4 MRSA 500 mg day 8 and then 500 mg biweekly 4 <i>E. faecium</i> or 4 <i>E. faecalis</i> | 503 days (median) | Clinical success: 75%            | Relapse: 12.5% | 12.5% (not-serious; leukopenia N = 1; rash N = 1) |  |
|                                |                                          |    | (8 total hip and 8 total knee arthroplasty infections) |                        | LD 1000 mg + 500-1000 mg/week                                                                                              |                   | Clinical failure: 12.5%          |                |                                                   |  |
|                                |                                          |    |                                                        |                        |                                                                                                                            |                   | Mortality rate: 6.3%             |                |                                                   |  |

|                               |                                          |                                                   |                                                                                            |                              |                                                                          |                                                                                                                              |            |                                                                              |                  |                                |
|-------------------------------|------------------------------------------|---------------------------------------------------|--------------------------------------------------------------------------------------------|------------------------------|--------------------------------------------------------------------------|------------------------------------------------------------------------------------------------------------------------------|------------|------------------------------------------------------------------------------|------------------|--------------------------------|
| Bork et al., 2019 [35]        | Retrospective cohort study, multicentric | 15<br>(28 overall patients included in the study) | 13<br>Osteomyelitis<br>1 Prosthetic joint infection<br>1 Septic arthritis<br><br>OPAT 100% | 100.0%<br>(median 13.5 days) | NA                                                                       | 8 MRSA<br>6 MSSA<br>4 CoNS<br>8 Other<br>5 NA                                                                                | 30-90 days | Overall clinical success:<br>71%<br>(Bone and joint infection 50% at 30-day) | NA               | 10.7%<br>(overall)             |
| Brescini et al., 2021 [36]    | Retrospective cohort study               | 13<br>(55 overall patients included)              | 13<br>Prosthetic joint infection                                                           | 96%                          | Dalbavancin 1500 mg single dose or 1500 mg + 1500 mg                     | 9 MRSA<br>6 polymicrobial<br>3 <i>S. epidermidis</i><br>2 <i>E. faecalis</i><br>1 MSSA<br>1 MRSE<br>8 Others<br>25 Empirical | NA         | Clinical success:<br>69.2%                                                   | NA               | 2%<br>(overall)                |
| Nunez-Nunez et al., 2018 [37] | Prospective observational                | 10<br>(19 overall patients included in the study) | 6<br>Osteomyelitis<br>4<br>Implanted prosthetic device infection                           | 100%                         | Dalbavancin 1500 mg single dose or 1500 mg + 1500 mg or 1000 mg + 500 mg | 7 MRSA<br>6 CoNS<br>5 MSSA<br>1 <i>E. faecalis</i><br>1 <i>E. faecium</i>                                                    | 90 days    | Clinical success:<br>100.0%                                                  | Relapse:<br>0.0% | 4.5%<br>(not serious; overall) |

|                                    |                                         |     |   |                                                                    |                                                                                                                                       |                                                                                  |                                     |           |                                                     |               |                   |
|------------------------------------|-----------------------------------------|-----|---|--------------------------------------------------------------------|---------------------------------------------------------------------------------------------------------------------------------------|----------------------------------------------------------------------------------|-------------------------------------|-----------|-----------------------------------------------------|---------------|-------------------|
| Vazquez Deida et al., 2020 [38]    | Retrospective observational case series | 6   | 5 | Osteomyelitis                                                      | 100.0%<br>(range 28–35 days)                                                                                                          | 1500 mg single dose                                                              | 3 MRSA<br>2 MSSA<br>1 GAS<br>1 MRSE | 90 days   | Clinical success: 83.3%<br>(16.7% clinical failure) | Relapse: 0.0% | 7.0%<br>(overall) |
| Azamgarhi et al., 2019 [39]        | Case report                             | 1   | 1 | Infected massive endoprosthetic replacement of the hip             | Vancomycin + Ceftriaxone + Amikacin for 5 days                                                                                        | Dalbavancin 1500 mg for two doses                                                | MRSE<br>Dalbavancin MIC <0.047 mg/L | 16 months | Clinical success: 100.0%                            | Relapse: 0.0% | None              |
| Trujillano Ruiz et al., 2019 [40]  | Case report                             | 1   | 1 | Prosthetic infection of the hip                                    | Vancomycin and then ciprofloxacin + rifampicin for 4 months, and then + Linezolid for 4 weeks                                         | Dalbavancin 1000 mg LD + 500 mg/week for 3 weeks                                 | MRSE                                | 1 month   | Clinical success: 100.0%                            | Relapse: 0.0% | None              |
| Carrion Madronal et al., 2020 [41] | Case report                             | 1   | 1 | Prosthetic infection of the hip                                    | Vancomycin for two weeks, then linezolid for two weeks                                                                                | Dalbavancin LD 1000 mg + 500 mg weekly for 7 weeks in combination with linezolid | MRSE                                | 16 weeks  | Clinical success: 100.0%                            | Relapse: 0.0% | None              |
| Ramirez-Hidalgo et al., 2018 [42]  | Case report                             | 1   | 1 | Prosthetic knee infection                                          | Daptomycin for 10 days                                                                                                                | Dalbavancin LD 1000 mg weeks + 500 mg/week for 3 weeks                           | MRSE<br>Dalbavancin MIC <0.047 mg/L | 9 months  | Clinical success: 100.0%                            | Relapse: 0.0% | None              |
| Fernandez et al., 2016 [43]        | In vitro study                          | 171 |   | Staphylococcal clinical isolates from prosthetic joint infections. |                                                                                                                                       |                                                                                  |                                     |           |                                                     |               |                   |
| Schmidt-Malan et al., 2016 [44]    |                                         |     |   |                                                                    | DAL: MBIC <sub>90</sub> 0.12–0.50 mg/L, MBBC <sub>90</sub> 2–4 mg/L<br>VAN: MBIC <sub>90</sub> 2–4 mg/L, MBBC <sub>90</sub> >128 mg/L |                                                                                  |                                     |           |                                                     |               |                   |

|                             |                                         |                                                                                                                                                                                                                                 |                                                                                                                                             |                                                                                                                                                                                                                                                                                                                                                                                                                |                                                                        |      |    |                      |      |      |  |
|-----------------------------|-----------------------------------------|---------------------------------------------------------------------------------------------------------------------------------------------------------------------------------------------------------------------------------|---------------------------------------------------------------------------------------------------------------------------------------------|----------------------------------------------------------------------------------------------------------------------------------------------------------------------------------------------------------------------------------------------------------------------------------------------------------------------------------------------------------------------------------------------------------------|------------------------------------------------------------------------|------|----|----------------------|------|------|--|
| Knafl et al., 2017 [45]     | In vitro study                          | 20                                                                                                                                                                                                                              | TDZ: MBIC <sub>90</sub> 2–4 mg/L, MBBC <sub>90</sub> >32 mg/L                                                                               |                                                                                                                                                                                                                                                                                                                                                                                                                |                                                                        |      |    |                      |      |      |  |
|                             |                                         |                                                                                                                                                                                                                                 | 10 MRSA plus 10 MRSE clinical strains.                                                                                                      |                                                                                                                                                                                                                                                                                                                                                                                                                |                                                                        |      |    |                      |      |      |  |
|                             |                                         |                                                                                                                                                                                                                                 | MRSA: MIC range 0.031–0.064 mg/L; MBIC 1–4 mg/L                                                                                             |                                                                                                                                                                                                                                                                                                                                                                                                                |                                                                        |      |    |                      |      |      |  |
|                             |                                         |                                                                                                                                                                                                                                 | MRSE: MIC range 0.023–0.625 mg/L; MBIC 2–16 mg/L                                                                                            |                                                                                                                                                                                                                                                                                                                                                                                                                |                                                                        |      |    |                      |      |      |  |
| Neudorfer et al., 2018 [46] | In vitro study                          | 83                                                                                                                                                                                                                              | 25 <i>E. faecium</i> plus 58 <i>E. faecalis</i> clinical isolates.                                                                          |                                                                                                                                                                                                                                                                                                                                                                                                                |                                                                        |      |    |                      |      |      |  |
|                             |                                         |                                                                                                                                                                                                                                 | DAL: for VSE: MBIC <sub>90</sub> 0.25 mg/L, MBBC <sub>90</sub> 1 mg/L for VRE: MBIC <sub>90</sub> > 16 mg/L, MBBC <sub>90</sub> >16 mg/L    |                                                                                                                                                                                                                                                                                                                                                                                                                |                                                                        |      |    |                      |      |      |  |
|                             |                                         |                                                                                                                                                                                                                                 | VAN: for VSE: MBIC <sub>90</sub> 2 mg/L, MBBC <sub>90</sub> >128 mg/L for VRE: MBIC <sub>90</sub> > 128 mg/L, MBBC <sub>90</sub> > 128 mg/L |                                                                                                                                                                                                                                                                                                                                                                                                                |                                                                        |      |    |                      |      |      |  |
|                             |                                         |                                                                                                                                                                                                                                 | DAP: for VSE: MBIC <sub>90</sub> 4 mg/L, MBBC <sub>90</sub> 128 mg/L for VRE: MBIC <sub>90</sub> 4 mg/L, MBBC <sub>90</sub> 128 mg/L        |                                                                                                                                                                                                                                                                                                                                                                                                                |                                                                        |      |    |                      |      |      |  |
| Ziemyte et al., 2020 [47]   | In vitro study                          | Clinical isolates of MSSA, MRSA, and MRSE.                                                                                                                                                                                      |                                                                                                                                             |                                                                                                                                                                                                                                                                                                                                                                                                                |                                                                        |      |    |                      |      |      |  |
|                             |                                         | 1. Biofilm inhibition. MBIC of DAL ranged 0.5–2 mg/L. RIF and DAL showed the highest inhibitory efficacy as compared with CLX, VAN, and LNZ.                                                                                    |                                                                                                                                             |                                                                                                                                                                                                                                                                                                                                                                                                                |                                                                        |      |    |                      |      |      |  |
|                             |                                         | 2. Biofilm treatment. DAL stopped or reduced biofilm at 8–32 mg/L. Comparators had no effect for <i>S. aureus</i> biofilm. For <i>S. epidermidis</i> biofilm, RIF and CLX were more effective than DAL at lower concentrations. |                                                                                                                                             |                                                                                                                                                                                                                                                                                                                                                                                                                |                                                                        |      |    |                      |      |      |  |
|                             |                                         | Jacob et al., 2021 [48]                                                                                                                                                                                                         | In vitro study                                                                                                                              | Dalbavancin and rifampicin exhibited a concentration-dependent antibiofilm activity, with dalbavancin being more effective. At a concentration of 16 mg/l, dalbavancin reduced the viable bacteria (CFU/ml) by 2.7 log-magnitudes, while 32 mg/l of rifampicin achieved a reduction of 1.9 log-magnitudes. In combination, rifampicin increased the effectiveness of dalbavancin, indicating additive effects. |                                                                        |      |    |                      |      |      |  |
| Solon et al., 2007 [49]     | Preclinical study                       |                                                                                                                                                                                                                                 |                                                                                                                                             | In a rabbit model, dalbavancin concentrations achieved a mean of 13.4 mg/L in bone marrow and a mean of 4.2 mg/L in cortical bone after a single dose of 20 mg/kg. Bone concentrations remained higher MIC <sub>90</sub> for up to 336 h.                                                                                                                                                                      |                                                                        |      |    |                      |      |      |  |
| Oritavancin                 |                                         |                                                                                                                                                                                                                                 |                                                                                                                                             |                                                                                                                                                                                                                                                                                                                                                                                                                |                                                                        |      |    |                      |      |      |  |
| Redell et al., 2019 [50]    | Retrospective observational multicenter | 3                                                                                                                                                                                                                               | Prosthetic joint infections                                                                                                                 | 100% of cases, including beta-lactams, clindamycin, TMP-SMX, vancomycin, and daptomycin                                                                                                                                                                                                                                                                                                                        | 2/3 cases: 1200 mg single dose<br>1/3 cases: 1200 mg × 2 every 14 days | NA   | NA | 66.7% cured          | NA   | None |  |
| Schulz et al., 2017 [51]    | Case series                             | 1                                                                                                                                                                                                                               | Infections associated with orthopaedic implants following                                                                                   | Oxacillin – Daptomycin (68 days)                                                                                                                                                                                                                                                                                                                                                                               | Oritavancin 1200 mg first dose followed by 800 mg                      | MSSA | NA | Clinical improvement | None | None |  |

|                            |                                         |                                                                                                                                                                                                                                                                          |                                                                                                                                                                                                                                                                                                                                                                                                                                                                                                                                                                                         |                          |                                                                          |                          |    |                                                                                               |    |                                                          |
|----------------------------|-----------------------------------------|--------------------------------------------------------------------------------------------------------------------------------------------------------------------------------------------------------------------------------------------------------------------------|-----------------------------------------------------------------------------------------------------------------------------------------------------------------------------------------------------------------------------------------------------------------------------------------------------------------------------------------------------------------------------------------------------------------------------------------------------------------------------------------------------------------------------------------------------------------------------------------|--------------------------|--------------------------------------------------------------------------|--------------------------|----|-----------------------------------------------------------------------------------------------|----|----------------------------------------------------------|
|                            |                                         |                                                                                                                                                                                                                                                                          | laminectomy in vertebral osteomyelitis                                                                                                                                                                                                                                                                                                                                                                                                                                                                                                                                                  | weekly for 5 weeks       |                                                                          |                          |    |                                                                                               |    |                                                          |
| Yan et al., 2018 [52]      | In vitro study                          | 185                                                                                                                                                                                                                                                                      | 67 MSSA, 37 MRSA, 22 MSSE, and 59 MRSE isolates from PJIs. The oritavancin MIC <sub>50</sub> for <i>S. aureus</i> and MSSE was 0.03 µg/mL, and for MRSE, it was 0.06 µg/mL; MIC <sub>90</sub> for <i>S. aureus</i> and <i>S. epidermidis</i> was 0.12 µg/mL for both the methicillin-resistant and -susceptible subgroups. The oritavancin MBBC <sub>50</sub> for <i>S. aureus</i> and <i>S. epidermidis</i> was 2 µg/mL for both the methicillin-resistant and -susceptible subgroups; the MBBC <sub>90</sub> for <i>S. aureus</i> and MSSE was 4 µg/mL, and for MRSE, it was 8 µg/mL. |                          |                                                                          |                          |    |                                                                                               |    |                                                          |
| Belley et al., 2009 [53]   | In vitro study                          | Oritavancin exhibited antibiofilm activity against MSSA, MRSA, and VRSA strains at MBECs ranging from 0.5 to 8 mg/L, providing a sterilization of the biofilm after a 1-h exposure at an MBEC of 4 mg/L. Conversely, MBECs for linezolid and vancomycin were > 128 mg/L. |                                                                                                                                                                                                                                                                                                                                                                                                                                                                                                                                                                                         |                          |                                                                          |                          |    |                                                                                               |    |                                                          |
| Yan et al., 2018 [54]      | In vitro study                          | 10                                                                                                                                                                                                                                                                       | 10 MRSA isolates from PJIs. Oritavancin combined with rifampicin demonstrated statistically significant bacterial reductions compared with those of either antimicrobial alone (rifampicin, linezolid, gentamycin) for all 10 isolates, with synergy being observed for 80% of the isolates.                                                                                                                                                                                                                                                                                            |                          |                                                                          |                          |    |                                                                                               |    |                                                          |
| Lehoux et al., 2015 [55]   | Preclinical study                       | In a rabbit model, bone/serum ratio of oritavancin ranged from 1.1 to 3.1 after a single dose of 20 mg/kg, with concentrations remaining stable for up to 168 h.                                                                                                         |                                                                                                                                                                                                                                                                                                                                                                                                                                                                                                                                                                                         |                          |                                                                          |                          |    |                                                                                               |    |                                                          |
| Telavancin                 |                                         |                                                                                                                                                                                                                                                                          |                                                                                                                                                                                                                                                                                                                                                                                                                                                                                                                                                                                         |                          |                                                                          |                          |    |                                                                                               |    |                                                          |
| Sims et al., 2021 [56]     | Retrospective observational multicenter | 57                                                                                                                                                                                                                                                                       | 30 osteomyelitis with prosthetic materials                                                                                                                                                                                                                                                                                                                                                                                                                                                                                                                                              | 71.5% of cases (overall) | Median dose: 37.8% MSRA<br>750 mg daily for a median duration of 26 days | 14.8% MSSA<br>10.0% CoNS | NA | 75.0% clinical cure in osteomyelitis with prosthetic materials<br>84.6% clinical cure in PJIs | NA | AEs rate: 19.9% (overall)<br>Serious AEs: 2.1% (overall) |
| Harting et al., 2017 [57]  | Case series                             | 8                                                                                                                                                                                                                                                                        | 6 osteomyelitis with prosthetic implants                                                                                                                                                                                                                                                                                                                                                                                                                                                                                                                                                | 37.5%                    | 10 mg/kg/day for 9-66 days (duration range)                              | NA                       | NA | 62.5% clinical cure                                                                           | NA | 25.0%                                                    |
| 2 PJIs                     |                                         |                                                                                                                                                                                                                                                                          |                                                                                                                                                                                                                                                                                                                                                                                                                                                                                                                                                                                         |                          |                                                                          |                          |    |                                                                                               |    |                                                          |
| LaPlante et al., 2009 [58] | In vitro study                          | Telavancin exhibited antibiofilm activity against <i>Staphylococcus</i> and <i>Enterococcus</i> strains at MBECs below the MIC and ranging from 0.125 to 2 mg/L. Conversely, vancomycin did not demonstrate similar activity (MBECs > 128 mg/L).                         |                                                                                                                                                                                                                                                                                                                                                                                                                                                                                                                                                                                         |                          |                                                                          |                          |    |                                                                                               |    |                                                          |

AEs: adverse events; CFU: colony format unit; CoNS: coagulase-negative Staphylococci; DAL: dalbavancin; DAP: daptomycin; GAS: group A *Streptococcus*; LD: loading dose; LNZ: linezolid; MBBCs: minimum biofilm bactericidal concentrations; MBECs: minimal biofilm eradication concentrations; MBICs: minimal biofilm inhibitory concentrations; MIC: minimum inhibitory concentration; MRSA: methicillin-resistant *S. aureus*; MRSE: methicillin-resistant *Staphylococcus epidermidis*; MSSA: methicillin-susceptible *S. aureus*; MSSE: methicillin-susceptible *Staphylococcus epidermidis*; NA: not assessed; OPAT: outpatient parental antibiotic therapy; PJIs: prosthetic joint infections; RIF: rifampicin; TDZ: tedizolid; TMP-SMX: cotrimoxazole; VAN: vancomycin; VRE: vancomycin-resistant *Enterococcus*; VRSA: vancomycin-resistant *S. aureus*; VSE: vancomycin-susceptible *Enterococcus*.



**Table S2.** A summary of the evidence investigating the off-label use of novel anti-staphylococcal cephalosporins for the management of infections associated with orthopaedic implants.

[illegible]

AEs: adverse events; CFUs: colony format unit; Cmax: peak concentration; EOT: end of treatment; MBBCs: minimum biofilm bactericidal concentrations; MBECs: minimal biofilm eradication concentrations; MBICs: minimal biofilm inhibitory concentrations; MIC: minimum inhibitory concentration; MRSA: methicillin-resistant *S. aureus*; MRSE: methicillin-resistant *Staphylococcus epidermidis*; MSSA: methicillin-susceptible *S. aureus*; MSSE: methicillin-susceptible *Staphylococcus epidermidis*; NA: not assessed; PJIs: prosthetic joint infections.

**Table S3.** A summary of the evidence investigating the off-label use of daptomycin for the management of infections associated with orthopaedic implants.

| Author, year, and reference | Study design                    | No. of patients | Clinical features                            | Prior antibiotic and duration | Antibiotic and dosing                                                                                                                                            | Isolates                      | Duration of follow-up | Outcome                                                                                                                                                                  | Relapse rate – Resistance development | Safety (Overall proportion of AEs)                              |
|-----------------------------|---------------------------------|-----------------|----------------------------------------------|-------------------------------|------------------------------------------------------------------------------------------------------------------------------------------------------------------|-------------------------------|-----------------------|--------------------------------------------------------------------------------------------------------------------------------------------------------------------------|---------------------------------------|-----------------------------------------------------------------|
| Byren et al., 2012 [69]     | Randomized controlled trial     | 75              | PJIs managed with two-stage revision         | NA                            | Daptomycin 6 mg/kg/day (25 patients) vs. Daptomycin 8 mg/kg/day (24 patients) vs. Comparator (Vancomycin, Teicoplanin, or Semisynthetic penicillin; 26 patients) | 25 MSSA<br>24 CoNS<br>13 MRSA | 4 months              | Clinical response: 59.6% daptomycin vs. 38.1% comparator<br><br>Microbiological eradication: 51.1% daptomycin vs. 38.1% comparator                                       | NA                                    | Discontinuation due to AEs: daptomycin 12.2% vs. 16% comparator |
| Carli et al., 2020 [70]     | Retrospective comparative study | 341             | PJIs managed with DAIR or two-stage exchange | NA                            | Daptomycin 6–9 mg/kg/day (77 patients) vs. Other regimens                                                                                                        | 32 MSSA<br>22 CoNS<br>21 MRSA | 2 years               | Daptomycin use was not associated with better clinical outcome either in patients undergoing DAIR (OR 1.70; 95%CI 0.62–4.65) or two-stage exchange (OR 0.58; 95%CI 0.27– | NA                                    | 7.8%                                                            |

|                           |                                          |    |                     |        | (cefazolin, oxacillin, or vancomycin)                                                                  | 1.26) when compared to other regimens.                                                                                        |         |                                                           |                                    |                                                                                                                |
|---------------------------|------------------------------------------|----|---------------------|--------|--------------------------------------------------------------------------------------------------------|-------------------------------------------------------------------------------------------------------------------------------|---------|-----------------------------------------------------------|------------------------------------|----------------------------------------------------------------------------------------------------------------|
| Joseph et al., 2019 [71]  | Retrospective matched case-control study | 40 | PJIs                | 100.0% | Daptomycin 10-12 mg/kg/day (20 patients) vs. Vancomycin 15 mg/kg LD + 30-40 mg/kg/day CI (20 patients) | 19 CoNS<br>13 MSSA<br>4 <i>E. faecalis</i><br>3 <i>Streptococcus spp</i><br>2 <i>P. acnes</i><br>2 <i>Corynebacterium spp</i> | 2 years | Clinical cure: 85% daptomycin vs. 90% vancomycin (p=0.63) | Relapse rate: 10% vs. 10% (p=0.99) | Overall AEs: 20% daptomycin vs. 30% vancomycin (p=0.47)<br><br>Discontinuation due to AEs: 0% vs. 25% (p=0.02) |
| Kuo et al., 2016 [73]     | Retrospective cohort study               | 22 | PJIs                | NA     | Daptomycin 6 mg/kg/day for days + local daptomycin in polymethylmethacrylate bone cement               | 10 MRSA<br>8 MRSE<br>4 CoNS                                                                                                   | 2 years | Clinical cure: 100.0%                                     | None                               | 4.5%                                                                                                           |
| Herrera et al., 2017 [74] | Retrospective cohort study               | 21 | PJIs<br>DAIR: 52.4% | 100.0% | Daptomycin 10 mg/kg/day + Rifampicin 600 mg/day for 5-45 days                                          | 10 <i>S. epidermidis</i><br>4 MRSA<br>3 MSSA<br>1 <i>S. lugdunensis</i><br>1 <i>S. hominis</i><br>3 Negative                  | NA      | Clinical cure: 85.7%                                      | NA                                 | 0.0%                                                                                                           |

|                                        |                                 |    |                                                                                       |                                                               |                                                                                                               |                                                                                    |                  |                      |                                                          |                          |
|----------------------------------------|---------------------------------|----|---------------------------------------------------------------------------------------|---------------------------------------------------------------|---------------------------------------------------------------------------------------------------------------|------------------------------------------------------------------------------------|------------------|----------------------|----------------------------------------------------------|--------------------------|
| Corona Perez-Cardona et al., 2012 [75] | Retrospective cohort study      | 20 | PJIs<br>(8 cases acute<br>9 cases chronic<br>3 cases positive intraoperative culture) | 100.0%                                                        | Daptomycin 6.6 mg/kg/day for a median of 44.9 days<br><br>Combination therapy with rifampicin in 40% of cases | 8 MRSE<br>5 MSSE<br>2 MRSA<br>2 MSSA<br>2 <i>Enterococcus</i><br>1 <i>P. acnes</i> | Median 20 months | Clinical cure: 78.6% | Relapse 21.4%                                            | 20.0%<br>(10.0% serious) |
| Lora-Tamayo et al., 2014 [76]          | Retrospective cohort study      | 18 | Acute PJIs due to FQ-resistant <i>Staphylococci</i> managed with DAIR                 | 100.0%                                                        | Daptomycin 10 mg/kg/day for 35-56 days<br>+<br>Rifampicin 600 mg/day for 35-74 days                           | 10 MRSA<br>7 CoNS<br>1 MSSA                                                        | Up to 3 years    | Clinical cure: 50%   | Relapse: 28.4% of cases<br><br>No resistance development | 0.0%                     |
| Chang et al., 2017 [77]                | Retrospective cohort study      | 16 | PJIs                                                                                  | 56.3%                                                         | Daptomycin 8.3 mg/kg/day for a median of 14 days                                                              | 10 MRSA<br>6 MRSE                                                                  | 2 years          | Clinical cure: 87.5% | NA                                                       | 6.3%                     |
| Rao et al., 2006 [72]                  | Prospective observational study | 12 | PJIs                                                                                  | NA                                                            | Daptomycin 4 mg/kg/day for 6 weeks                                                                            | 7 MRSA<br>4 MRSE<br>1 MSSA                                                         | Up to 13 months  | Clinical cure: 50%   | Relapse: 45%                                             | 0.0%                     |
| Yuste et al., 2014 [78]                | Case report                     | 1  | PJI                                                                                   | Vancomycin, Levofloxacin, Ampicillin + Ceftriaxone, Linezolid | Daptomycin 10 mg/kg/day for 12 weeks                                                                          | <i>E. faecalis</i>                                                                 | 39 months        | Clinical cure        | No                                                       | None                     |
| Luengo et al., 2018 [79]               | Case report                     | 1  | Difficult-to-treat infection of a total femoral                                       | Ampicillin + Ceftriaxone, then Amoxicillin and Vancomycin     | Daptomycin 10 mg/kg/day for 42 days<br>+                                                                      | <i>E. faecalis</i>                                                                 | 2 years          | Clinical cure        | No                                                       | None                     |

|                                |                       |                                                                                                                                                                                                                                                                                                                                                                                                                                                                                                                                                                                                                                                                                                                                                                   | replacemen<br>t                                                                                                                                                                                                                                                       | Fosfomycin 2<br>g q6h/day for<br>42 days |
|--------------------------------|-----------------------|-------------------------------------------------------------------------------------------------------------------------------------------------------------------------------------------------------------------------------------------------------------------------------------------------------------------------------------------------------------------------------------------------------------------------------------------------------------------------------------------------------------------------------------------------------------------------------------------------------------------------------------------------------------------------------------------------------------------------------------------------------------------|-----------------------------------------------------------------------------------------------------------------------------------------------------------------------------------------------------------------------------------------------------------------------|------------------------------------------|
| Montange et al.,<br>2014 [80]  | Phase I study         | 16                                                                                                                                                                                                                                                                                                                                                                                                                                                                                                                                                                                                                                                                                                                                                                | Mean daptomycin bone penetration rate of 14.1±11.9% in 16 arthroplasty patients after 8 mg/kg dose with mean concentrations of 36.3±2.9, 6.5±3.6, and 21.6±6.8 mg/mL in shinbone, thighbone, and synovial fluid, respectively.                                        |                                          |
| Molina Manso et al., 2013 [81] | In vitro study        | 32                                                                                                                                                                                                                                                                                                                                                                                                                                                                                                                                                                                                                                                                                                                                                                | 17 <i>S. aureus</i> and 15 <i>S. epidermidis</i> isolates from PJIs. Daptomycin was not effective against biofilms in either species, with minimum biofilm eradication concentrations (MBECs) significantly above the minimum inhibitory concentrations (>1024 mg/L). |                                          |
| Garrigos et al., 2010 [82]     | In vitro/animal study | Only daptomycin (at 6 mg/kg and 10 mg/kg) alone and in combination with rifampicin achieved a bactericidal effect in log and stationary phases against MRSA compared to vancomycin and linezolid. Furthermore, in a rat foreign-body infection model, a therapeutic regimen with daptomycin at 100 mg/kg/day for 7 days performed better than vancomycin and linezolid. In combination with rifampin, both dosages of daptomycin (100 mg/kg/day and 45 mg/kg/day) were significantly better than all other combinations, but daptomycin at 100 mg/kg/day plus rifampin achieved better cure rates at day 11 (P < 0.05) than daptomycin at 45 mg/kg/day plus rifampin. Resistant strains were found in monotherapies with rifampin and daptomycin at 45 mg/kg/day. |                                                                                                                                                                                                                                                                       |                                          |
| Jahanbakhsh et al., 2020 [83]  | In vitro study        | Combination therapy including daptomycin at a dosage of 8-14 mg/kg and ceftaroline or rifampicin provides promising results in infections caused by biofilm producing VRE.                                                                                                                                                                                                                                                                                                                                                                                                                                                                                                                                                                                        |                                                                                                                                                                                                                                                                       |                                          |

AEs: adverse events; CFU: colony format unit; CI: continuous infusion; CoNS: coagulase-negative *Staphylococci*; DAIR: debridement and implant retention; FQ: fluoroquinolone; LD: loading dose; MBBCs: minimum biofilm bactericidal concentrations; MBECs: minimal biofilm eradication concentrations; MBICs: minimal biofilm inhibitory concentrations; MIC: minimum inhibitory concentration; MRSA: methicillin-resistant *S. aureus*; MRSE: methicillin-resistant *Staphylococcus epidermidis*; MSSA: methicillin-susceptible *S. aureus*; MSSE: methicillin-susceptible *Staphylococcus epidermidis*; NA: not assessed; OR: odds ratio; PJIs: prosthetic joint infections; VRE: vancomycin-resistant *Enterococcus*.

**Table S4.** A summary of the evidence investigating the off-label use of linezolid and tedizolid for the management of infections associated with orthopaedic implants.

| Author, year, and reference  | Study design                    | No. of patients                                       | Clinical features                                                 | Prior antibiotic and duration | Antibiotic and dosing                                                               | Isolates                                                                               | Duration of follow-up | Outcome                                                                                                                        | Relapse rate – Resistance development | Safety (Overall proportion of AEs) |
|------------------------------|---------------------------------|-------------------------------------------------------|-------------------------------------------------------------------|-------------------------------|-------------------------------------------------------------------------------------|----------------------------------------------------------------------------------------|-----------------------|--------------------------------------------------------------------------------------------------------------------------------|---------------------------------------|------------------------------------|
| Soriano et al., 2007 [84]    | Prospective observational study | 85                                                    | 69 PJIs<br><br>All were orthopaedic implant-associated infections | NA                            | Linezolid 600 mg q12h for a median of 60 days                                       | 45 MRSE<br>9 MRSA                                                                      | > 12 months           | Remission rate: 68.2%                                                                                                          | NA                                    | 10.5%                              |
| Gomez et al., 2011 [85]      | Prospective observational study | 49                                                    | PJIs                                                              | 100.0%                        | Linezolid 600 mg q12h<br>+<br>Rifampicin 300 mg q12h for a mean of 80.2 days        | 22 MRSE<br>6 MRSA                                                                      | 2 years               | Remission rate: 69.4%                                                                                                          | NA                                    | 36.7%                              |
| Morata et al., 2014 [90]     | Retrospective cohort study      | 39                                                    | Acute PJIs managed with DAIR                                      | NA                            | Linezolid 600 mg q12h for a median of 44.5 days<br>±<br>Rifampicin (in 22 patients) | 23 MRSE<br>10 MSSE<br>5 MSRA<br>4 MSSA<br>4 <i>E. faecalis</i><br>2 <i>S. viridans</i> | Median 2.5 years      | Clinical cure: 71.8%<br><br>No difference in outcome between patients receiving concomitant therapy with or without rifampicin | Relapse: 20.5%                        | 38%                                |
| Senneville et al., 2006 [91] | Retrospective cohort study      | 37<br><br>(overall 66 patients included in the study) | 37 orthopaedic device-related infections                          | NA                            | Linezolid 600 mg q12h for a median of 13 weeks                                      | 68.1% MRSA                                                                             | > 12 months           | Clinical remission: 81%                                                                                                        | Relapse: 10.8%                        | 54.5%                              |

| Table 1. Clinical studies of Linezolid in the treatment of orthopaedic implant-associated infections (PJI). |                                          |                                                |                                                                                  |                  |                                                                 |                                                                                                          |                     |                                   |               |                                                                                                                              |
|-------------------------------------------------------------------------------------------------------------|------------------------------------------|------------------------------------------------|----------------------------------------------------------------------------------|------------------|-----------------------------------------------------------------|----------------------------------------------------------------------------------------------------------|---------------------|-----------------------------------|---------------|------------------------------------------------------------------------------------------------------------------------------|
| Author (Year)                                                                                               | Study Design                             | No. of Patients                                | No. of PJIs                                                                      | Linezolid Dosage | Linezolid Duration                                              | Microbiology                                                                                             | Duration of Therapy | Clinical Outcome                  | Relapse Rate  | Discontinuation Rate                                                                                                         |
| Rao et al., 2007 [86]                                                                                       | Prospective observational study          | 34 (overall 53 patients included in the study) | 34 of which 27 PJIs<br>orthopaedic device-related infections<br>of which 23 PJIs | NA               | Linezolid 600 mg q12h for a mean of 9.6 weeks                   | 21 MRSA<br>17 MRSE<br>6 MSSA<br>5 VRE<br>2 MSSE<br>2 other                                               | Mean 24.9 months    | Clinical cure: 91.2%              | Relapse: 2.9% | 22.6%<br>Discontinuation due to serious AEs: 5.7%                                                                            |
| Cobo et al., 2013 [87]                                                                                      | Prospective observational study          | 25                                             | Late-chronic PJIs managed with two-step exchange                                 | NA               | Linezolid 600 mg q12h for 6 weeks                               | 18 CoNS<br>4 <i>S. aureus</i><br>3 <i>Streptococcus spp</i><br>1 <i>P. acnes</i><br>1 <i>C. striatum</i> | 1 year              | Clinical improvement: 91%         | Relapse: 9%   | 76% (overall)<br>Discontinuation due to serious AEs: 12%                                                                     |
| Bassetti et al., 2005 [92]                                                                                  | Retrospective cohort study               | 20                                             | PJIs                                                                             | 75%              | Linezolid 600 mg q12h ev/os for a mean of 7.2 weeks             | 14 MRSA<br>5 MRSE<br>1 <i>Enterococcus spp</i>                                                           | 12 months           | Clinical cure: 80%                | Relapse: 20%  | No cases of treatment discontinuation due to AEs                                                                             |
| Razonable et al., 2004 [93]                                                                                 | Retrospective cohort study               | 20                                             | 75% orthopaedic implant-associated infections                                    | NA               | Linezolid 600 mg q12h for a range of 3–60 weeks                 | 9 MRSE<br>3 MRSA                                                                                         | Median 276 days     | Clinical cure or improvement: 90% | Relapse: 5%   | 55%                                                                                                                          |
| Nguyen et al., 2009 [88]                                                                                    | Retrospective matched case-control study | 18 (overall 28 patients included in the study) | Orthopaedic implant-associated infections of which 11 PJIs                       | NA               | Linezolid 600 mg q12h for a range of 2–60 weeks<br>+ Rifampicin | NA                                                                                                       | 3–62 months         | Clinical remission: 94.1%         | NA            | 42.9% of which discontinuation occurred in 14.3% of patients<br>No differences between the two therapeutic regimens in terms |

|                            |                                          |                                                   |                                                                    | vs.<br>TMP/SMX<br>+<br>Rifampicin |                                              | therapeutic regimens<br>(89.3% vs. 78.6%;<br>p=0.47) |                        | of overall AE rate: 42.9% vs.<br>46.4% (p=0.99)             |                                                                                    |                             |
|----------------------------|------------------------------------------|---------------------------------------------------|--------------------------------------------------------------------|-----------------------------------|----------------------------------------------|------------------------------------------------------|------------------------|-------------------------------------------------------------|------------------------------------------------------------------------------------|-----------------------------|
| Vercillo et al., 2007 [94] | Retrospective cohort study               | 14                                                | Orthopaedic implant-associated infections of which 4 PJIs          | NA                                | Linezolid 600 mg q12h for 6 weeks            | 10 MRSA                                              | > 6 months             | Clinical remission: 100.0%                                  | None                                                                               | 0%                          |
| Oussedik et al., 2008 [95] | Retrospective cohort study               | 14                                                | Infected total joint arthroplasty treated by 1 or 2-stage revision | NA                                | Linezolid 600 mg q12h for 3-12 weeks         | 4 MRSA<br>4 MRSE                                     | 9-62 months            | Clinical remission: 100.0%                                  | None                                                                               | 21.3%                       |
| Papadopoulos et al., [89]  | Retrospective matched case-control study | 10<br>(overall 51 patients included in the study) | 10 orthopaedic device-related infections of which 8 PJIs           | NA                                | Linezolid 600 mg q12h for 2-13 weeks         | 4 MRSE<br>3 MRSA                                     | Up to end of treatment | Clinical remission: 80.0%                                   |                                                                                    | 44% vs. 6% in control group |
| Benavent et al., 2021 [96] | Retrospective multicenter study          | 29<br>(overall 51 patients included in the study) | 29 orthopaedic device-related infections of which 17 PJIs          | NA                                | Tedizolid 200 mg/day for a median of 29 days | 26 CoNS<br>11 MSSA<br>10 MRSA<br>13 Others           | Median 630 days        | Clinical cure in orthopaedic device-related infections: 83% | Failure in 24% of PJIs and in 17% of cases of orthopedic device-related infections | 6%<br>(mild)                |
|                            |                                          |                                                   |                                                                    |                                   |                                              |                                                      |                        | Clinical cure in PJIs: 76%                                  |                                                                                    |                             |
|                            |                                          |                                                   |                                                                    |                                   |                                              |                                                      |                        | No difference between                                       |                                                                                    |                             |



|                                    |                |                                                                                                                                                                                                                                                                                                                                                                                                                          |                                                                                                                                                                                                                                                                                                                                                                                                                                                                                                                                                                                                                                                                                                                                                           |                                           |                                                                    |                       |          | monotherapy and<br>combination therapy<br>with rifampicin |      |      |
|------------------------------------|----------------|--------------------------------------------------------------------------------------------------------------------------------------------------------------------------------------------------------------------------------------------------------------------------------------------------------------------------------------------------------------------------------------------------------------------------|-----------------------------------------------------------------------------------------------------------------------------------------------------------------------------------------------------------------------------------------------------------------------------------------------------------------------------------------------------------------------------------------------------------------------------------------------------------------------------------------------------------------------------------------------------------------------------------------------------------------------------------------------------------------------------------------------------------------------------------------------------------|-------------------------------------------|--------------------------------------------------------------------|-----------------------|----------|-----------------------------------------------------------|------|------|
| Ferry et al., 2018 [97]            | Case report    | 1                                                                                                                                                                                                                                                                                                                                                                                                                        | PJI                                                                                                                                                                                                                                                                                                                                                                                                                                                                                                                                                                                                                                                                                                                                                       | Daptomycin +<br>Ceftaroline,<br>Linezolid | Tedizolid 200<br>mg/day for<br>long-term<br>suppressive<br>therapy | <i>S. epidermidis</i> | 4 months | Clinical cure 100.0%                                      | None | None |
| Rana et al., 2002 [98]             | Phase I study  | Ten patients undergoing prosthetic joint replacement were enrolled, and linezolid 600 mg q12h orally was administered. Mean concentrations in cancellous bone, synovium, and synovial fluid were >4 mg/mL that are at least double the MIC <sub>90</sub> for both <i>Staphylococci</i> (2 mg/L) and <i>Streptococci</i> (1 mg/L).                                                                                        |                                                                                                                                                                                                                                                                                                                                                                                                                                                                                                                                                                                                                                                                                                                                                           |                                           |                                                                    |                       |          |                                                           |      |      |
| Kutscha-Lissberg et al., 2003 [99] | Phase I study  | Bone and joint penetration of linezolid 600 mg was assessed in 13 patients suffering from implant-associated infections with methicillin-resistant <i>staphylococci</i> . Mean concentrations of linezolid in infected tissues were greater than 10 mg/liter in a sampling time range of 35 to 124 min after administration of the preoperative dose, except in bone specimens, where they reached 3.9 +/- 2.0 mg/liter. |                                                                                                                                                                                                                                                                                                                                                                                                                                                                                                                                                                                                                                                                                                                                                           |                                           |                                                                    |                       |          |                                                           |      |      |
| Abad et al., 2019 [100]            | In vitro study | 3                                                                                                                                                                                                                                                                                                                                                                                                                        | Three MRSA strains retrieved from bone and joint infections. Linezolid and tedizolid weakly reduced the intracellular inoculum of <i>S. aureus</i> in a strain-dependent manner despite the similar MICs for the tested strains. Additionally, both agents were ineffective in eradicating mature biofilm formed in vitro, with MBEC >2000 and >675 mg/L, respectively, for linezolid and tedizolid. However, linezolid, and in particularly tedizolid, are able to prevent biofilm formation.                                                                                                                                                                                                                                                            |                                           |                                                                    |                       |          |                                                           |      |      |
| El Haj et al., 2018 [101]          | In vitro study | 2                                                                                                                                                                                                                                                                                                                                                                                                                        | One MRSA and one MSSA biofilm-producing strains were assessed. TMP/SMX and linezolid alone showed no and low activity, respectively, but no resistance emerged. The combinations with rifampicin significantly increased the anti-biofilm efficacy against MSSA ( $\Delta\log$ cfu/mL 56h-0h: TMP/SMX-RIF: -2.9 and LDZ-RIF: -3.1), but rifampicin-resistant strains appeared with TMP/SMX-RIF. Against MRSA, LZD-RIF (-3.1) protected against the emergence of resistance and was more effective than the TMP/SMX-RIF combination (-0.6, $p < 0.05$ ), in which RIF-resistant strains were again detected. LVX-RIF combination confirmed its high efficacy against biofilm-embedded bacteria, this being the most effective therapy (-5.1 against MSSA). |                                           |                                                                    |                       |          |                                                           |      |      |

AEs: adverse events; CoNS: coagulase-negative *Staphylococci*; LVX: levofloxacin; MBBCs: minimum biofilm bactericidal concentrations; MBECs: minimal biofilm eradication concentrations; MBICs: minimal biofilm inhibitory concentrations; MIC: minimum inhibitory concentration; MRSA: methicillin-resistant *S. aureus*; MRSE: methicillin-resistant *Staphylococcus epidermidis*; MSSA: methicillin-susceptible *S. aureus*; MSSE: methicillin-susceptible *Staphylococcus epidermidis*; NA: not assessed; PJIs: prosthetic joint infections; RIF: rifampicin; TMP-SMX: cotrimoxazole; VRE: vancomycin-resistant *Enterococcus*.

**Table S5.** A summary of the evidence investigating the off-label use of fluoroquinolones for the management of infections associated with orthopaedic implants.

| Author, year, and reference          | Study design                     | No. of patients | Clinical features      | Prior antibiotic and duration | Antibiotic and dosing                                                                                  | Isolates                                                                                               | Duration of follow-up | Outcome                                                                                                                                                                                                                                | Relapse rate – Resistance development | Safety (Overall proportion of AEs)        |
|--------------------------------------|----------------------------------|-----------------|------------------------|-------------------------------|--------------------------------------------------------------------------------------------------------|--------------------------------------------------------------------------------------------------------|-----------------------|----------------------------------------------------------------------------------------------------------------------------------------------------------------------------------------------------------------------------------------|---------------------------------------|-------------------------------------------|
| Lora-Tamayo et al., 2016 [122]       | Randomized controlled trial      | 63              | PJIs managed with DAIR | NA                            | Levofloxacin 750 mg/day + Rifampicin 600 mg/day for 8 weeks (33 patients) vs. 3-6 months (30 patients) | All caused by <i>S. aureus</i> or CoNS isolates                                                        | Median 540 days       | Cure rate: 58% vs. 73% (long vs. short schedules; ITT analysis; difference –15.7%, 95% CI –39.2% to 7.8%)<br><br>Cure rate: 95.0% vs. 91.7% (long vs. short schedules; per-protocol analysis; difference 3.3%, 95% CI –11.7% to 18.3%) | Relapse rate: 7%                      | 15.9%                                     |
| Nguyen et al., 2015 [123]            | Retrospective cohort study       | 154             | PJIs (35.1% DAIR)      | 100.0%                        | Levofloxacin 750 mg/day + Rifampicin 600 mg q12h/day                                                   | 74 CoNS<br>60 MSSA<br>19 <i>Streptococcus spp</i><br>7 <i>P. acnes</i><br>3 <i>Corynebacterium spp</i> | Mean 55.6 months      | Clinical remission rate: 82.5%                                                                                                                                                                                                         | Clinical failure: 17.5%               | 31.2% (rifampicin)<br>8.4% (levofloxacin) |
| Wouthuyzen-Bakker et al., 2018 [124] | Retrospective case-control study | 58              | PJIs managed with DAIR | 100.0%                        | Levofloxacin 500 mg/day +                                                                              | All caused by MSSA                                                                                     | Mean 50-67 months     | Clinical cure rate: 89% vs 87.5% (p=0.89)                                                                                                                                                                                              | Relapse rate: 5.2%                    | NA                                        |

|                                     |                            |                                                                                                                                                                                                                                                                                                                                                                                     |                                                                                                                                                                                                                                                                                                                                                                                                                                                                                                                                                                                                                                                        |     |                         |                             |                 |                           |               |       |
|-------------------------------------|----------------------------|-------------------------------------------------------------------------------------------------------------------------------------------------------------------------------------------------------------------------------------------------------------------------------------------------------------------------------------------------------------------------------------|--------------------------------------------------------------------------------------------------------------------------------------------------------------------------------------------------------------------------------------------------------------------------------------------------------------------------------------------------------------------------------------------------------------------------------------------------------------------------------------------------------------------------------------------------------------------------------------------------------------------------------------------------------|-----|-------------------------|-----------------------------|-----------------|---------------------------|---------------|-------|
|                                     |                            |                                                                                                                                                                                                                                                                                                                                                                                     |                                                                                                                                                                                                                                                                                                                                                                                                                                                                                                                                                                                                                                                        |     | Rifampicin              |                             |                 |                           |               |       |
|                                     |                            |                                                                                                                                                                                                                                                                                                                                                                                     |                                                                                                                                                                                                                                                                                                                                                                                                                                                                                                                                                                                                                                                        |     | 600 mg/day              |                             |                 |                           |               |       |
|                                     |                            |                                                                                                                                                                                                                                                                                                                                                                                     |                                                                                                                                                                                                                                                                                                                                                                                                                                                                                                                                                                                                                                                        |     | (40 patients)           |                             |                 |                           |               |       |
|                                     |                            |                                                                                                                                                                                                                                                                                                                                                                                     |                                                                                                                                                                                                                                                                                                                                                                                                                                                                                                                                                                                                                                                        |     | vs.                     |                             |                 |                           |               |       |
|                                     |                            |                                                                                                                                                                                                                                                                                                                                                                                     |                                                                                                                                                                                                                                                                                                                                                                                                                                                                                                                                                                                                                                                        |     | Moxifloxacin            |                             |                 |                           |               |       |
|                                     |                            |                                                                                                                                                                                                                                                                                                                                                                                     |                                                                                                                                                                                                                                                                                                                                                                                                                                                                                                                                                                                                                                                        |     | 400 mg/day              |                             |                 |                           |               |       |
|                                     |                            |                                                                                                                                                                                                                                                                                                                                                                                     |                                                                                                                                                                                                                                                                                                                                                                                                                                                                                                                                                                                                                                                        |     | +                       |                             |                 |                           |               |       |
|                                     |                            |                                                                                                                                                                                                                                                                                                                                                                                     |                                                                                                                                                                                                                                                                                                                                                                                                                                                                                                                                                                                                                                                        |     | Rifampicin              |                             |                 |                           |               |       |
|                                     |                            |                                                                                                                                                                                                                                                                                                                                                                                     |                                                                                                                                                                                                                                                                                                                                                                                                                                                                                                                                                                                                                                                        |     | 450 mg/day              |                             |                 |                           |               |       |
|                                     |                            |                                                                                                                                                                                                                                                                                                                                                                                     |                                                                                                                                                                                                                                                                                                                                                                                                                                                                                                                                                                                                                                                        |     | (18 patients)           |                             |                 |                           |               |       |
| Fily et al., 2019 [125]             | Retrospective cohort study | 23                                                                                                                                                                                                                                                                                                                                                                                  | PJIs managed with DAIR, or 1- or 2-stage exchange                                                                                                                                                                                                                                                                                                                                                                                                                                                                                                                                                                                                      | 87% | Moxifloxacin 400 mg/day | 12 <i>Streptococcus spp</i> | Up to 44 months | Clinical cure rate: 78.3% | Relapse: 4.3% | 30.4% |
|                                     |                            |                                                                                                                                                                                                                                                                                                                                                                                     |                                                                                                                                                                                                                                                                                                                                                                                                                                                                                                                                                                                                                                                        |     | +                       | 6 <i>P. acnes</i>           |                 |                           |               |       |
|                                     |                            |                                                                                                                                                                                                                                                                                                                                                                                     |                                                                                                                                                                                                                                                                                                                                                                                                                                                                                                                                                                                                                                                        |     | Rifampicin median       | 5 <i>E. faecalis</i>        |                 |                           |               |       |
|                                     |                            |                                                                                                                                                                                                                                                                                                                                                                                     |                                                                                                                                                                                                                                                                                                                                                                                                                                                                                                                                                                                                                                                        |     | 11 mg/kg/day            |                             |                 |                           |               |       |
| Muller-Serieys et al., 2009 [119]   | Preclinical study          | In a rabbit model of prosthetic knee infection due to a susceptible clinical strain of <i>S. aureus</i> , the combination of levofloxacin and rifampicin was bactericidal, significantly reduced bacterial titers in bone compared with levels for rifampicin and controls ( $p < 0.05$ ) and prevented the selection of resistant mutants that was observed with rifampicin alone. |                                                                                                                                                                                                                                                                                                                                                                                                                                                                                                                                                                                                                                                        |     |                         |                             |                 |                           |               |       |
| Melendez-Carmona et al., 2019 [126] | In vitro study             | 10                                                                                                                                                                                                                                                                                                                                                                                  | Ten MSSA strains for infection in an osteoblastic cell model receiving treatment with levofloxacin and rifampicin. Levofloxacin was the most effective treatment at both cortical and cancellous bone concentrations (-2.4 to -1.9 log 10 CFU, respectively). The addition of rifampicin to levofloxacin did not improve performance (-1.9 log 10 CFU for cortical concentration and -1.8 log 10 CFU for cancellous concentration). An increase in small colony variants was observed in the presence of rifampicin. The addition of rifampicin to levofloxacin showed no benefit, but could account for an increased number of small colony variants. |     |                         |                             |                 |                           |               |       |

AEs: adverse events; CFU: colony format unit; CoNS: coagulase-negative *Staphylococci*; DAIR: debridement and implant retention; ITT: intention-to-treat; LD: loading dose; MSSA: methicillin-susceptible *S. aureus*; NA: not assessed; PJIs: prosthetic joint infections.
